# Supplementary material for: Hierarchically porous RhB-encapsulated ZIF-7 as a dual-emission fluorescence probe for ultrasensitive detection of melamine in infant formulations
Source: Royal Society of Chemistry journal article supplement (doi:10.1039/d5na00633c), 2025-01-01
Supplement: d5na00633c1.pdf [file d5na00633c1.pdf]

# A hierarchically porous RhB encapsulated ZIF-7 as a dual emission fluorescence probe for ultrasensitive detection of melamine in infant formulations

Sreevidhya K B, Suvardhan Kanchi\*

\*Department of Chemistry, CHRIST University, Bengaluru 560029, India

\*Centre for Renewable Energy and Environmental Sustainability, CHRIST University, Bengaluru 560 029, India

## Supplementary Information

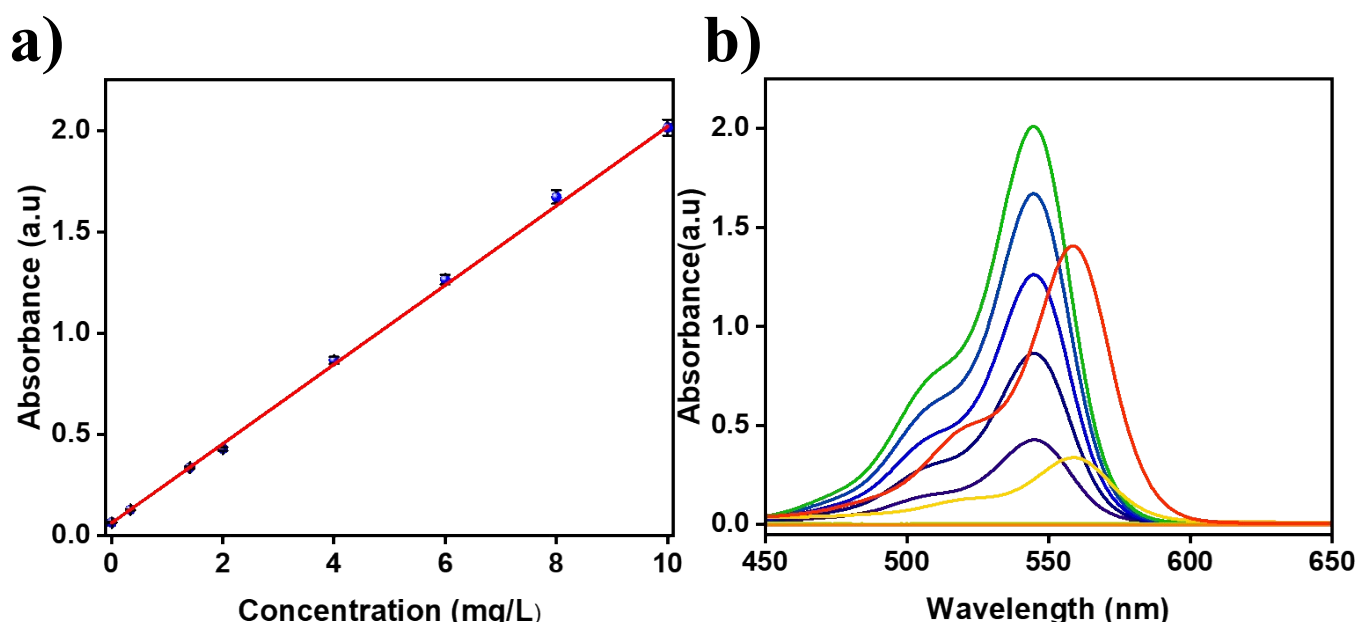

**Figure S1.** Standard absorbance curve of RhB aqueous solution and absorbance of acid hydrolysis solution for pristine ZIF-7, RhB<sub>10</sub>@ZIF-7, RhB<sub>30</sub>@ZIF-7, RhB<sub>50</sub>@ZIF-7, and RhB standard aqueous solutions.

## Acid hydrolysis of RhB<sub>x</sub>@ZIF-7 and pristine ZIF-7 in controlled experiments

50 mg RhB<sub>x</sub>@ZIF-7 and pristine ZIF-7 were dispersed in 1 ml 1M HCl and allowed to decompose fully. The obtained solutions were diluted appropriately and were collected by filtration using a 0.45 µm PTFE syringe filter. Absorbance of these solutions was measured. The RhB solution concentration is calculated by the RhB standard curve, and the loaded weight percentage (w%) is determined.

**Table S1:** Loaded weight percentage of RhB in different samples.

|    | Samples                  | M <sub>RhB<sub>x</sub>@ZIF-7</sub><br>(mg) | C <sub>RhB</sub><br>(mg/L) | M <sub>RhB</sub><br>(mg) | X <sub>RhB</sub><br>(w%) |
|----|--------------------------|--------------------------------------------|----------------------------|--------------------------|--------------------------|
| 1. | ZIF-7                    | 50                                         | 0                          | 0                        | 0                        |
| 2. | RhB <sub>10</sub> @ZIF-7 | 50.0                                       | 0.01149                    | $3.449 \times 10^{-5}$   | 0.069                    |
| 3. | RhB <sub>30</sub> @ZIF-7 | 50.0                                       | 0.3321                     | $9.962 \times 10^{-4}$   | 2                        |
| 4. | RhB <sub>50</sub> @ZIF-7 | 50.0                                       | 1.399                      | $4.196 \times 10^{-3}$   | 8.4                      |

M<sub>RhB<sub>x</sub>@ZIF-7</sub> = mass of composite hydrolyzed

C<sub>RhB</sub> = Concentration of RhB after hydrolysis

M<sub>RhB</sub> = Mass of RhB recovered

X<sub>RhB</sub> = RhB loading as weight %

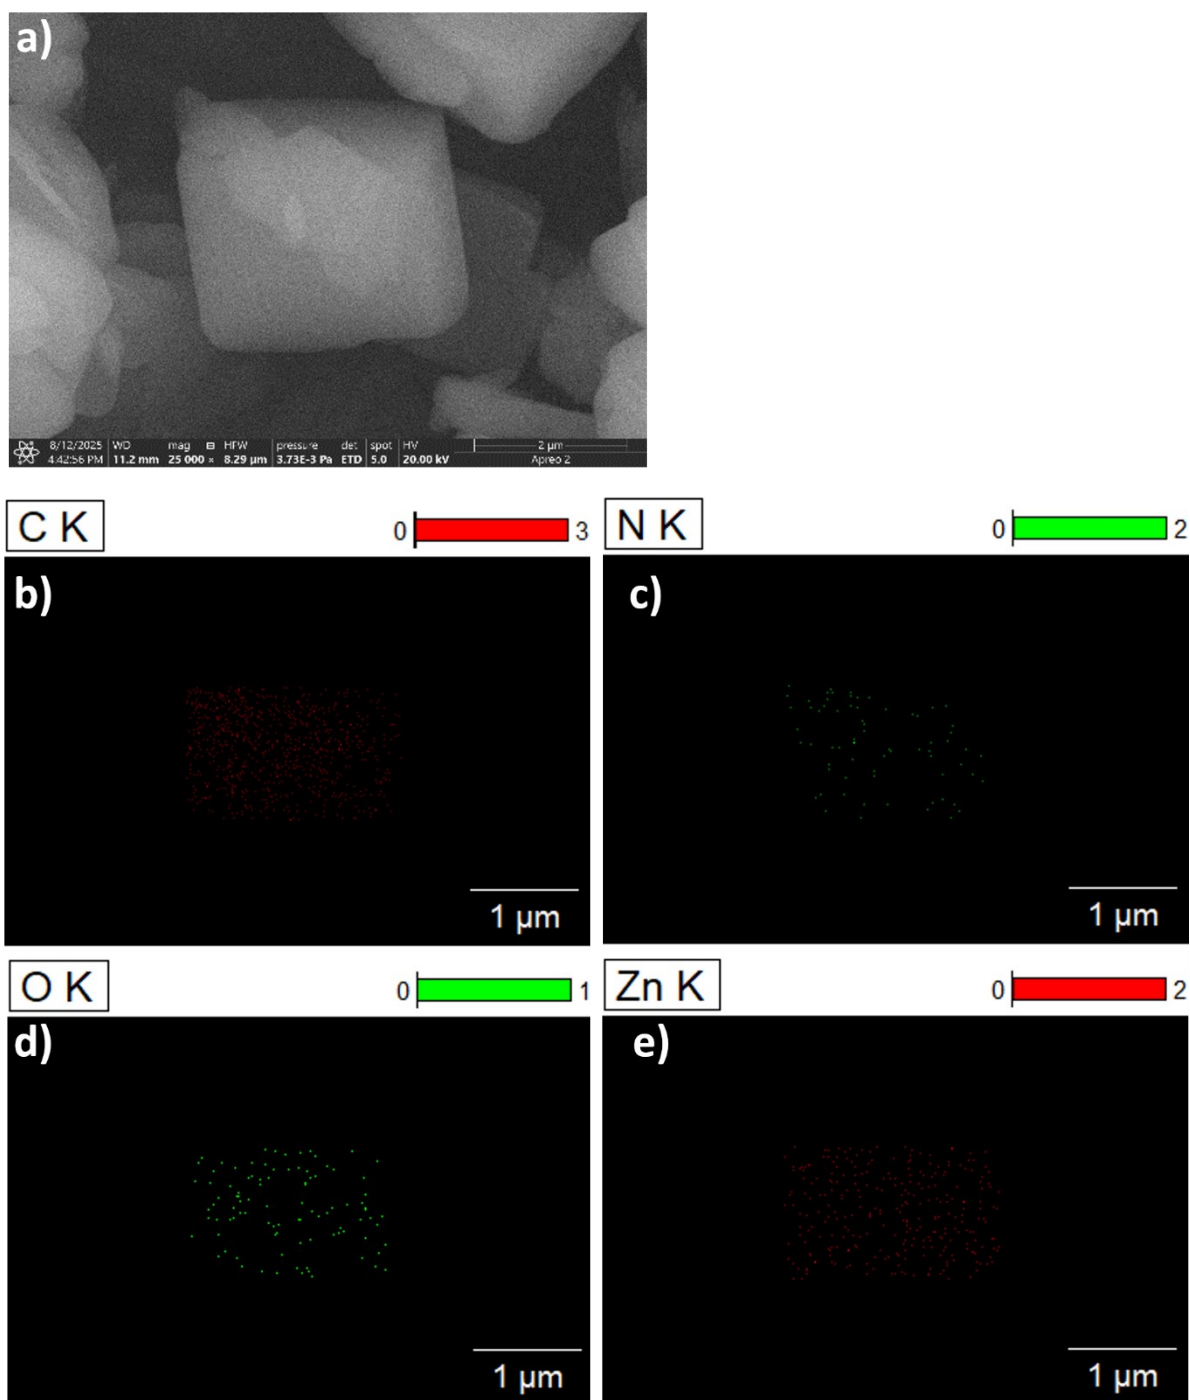

**Figure S2.** SEM image and elemental mapping of pristine ZIF-7.

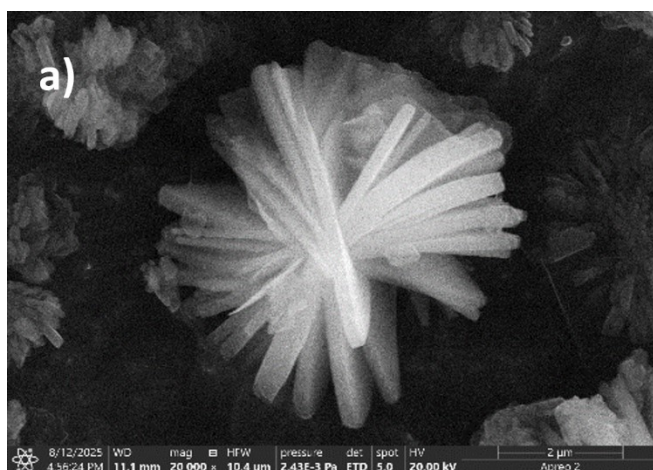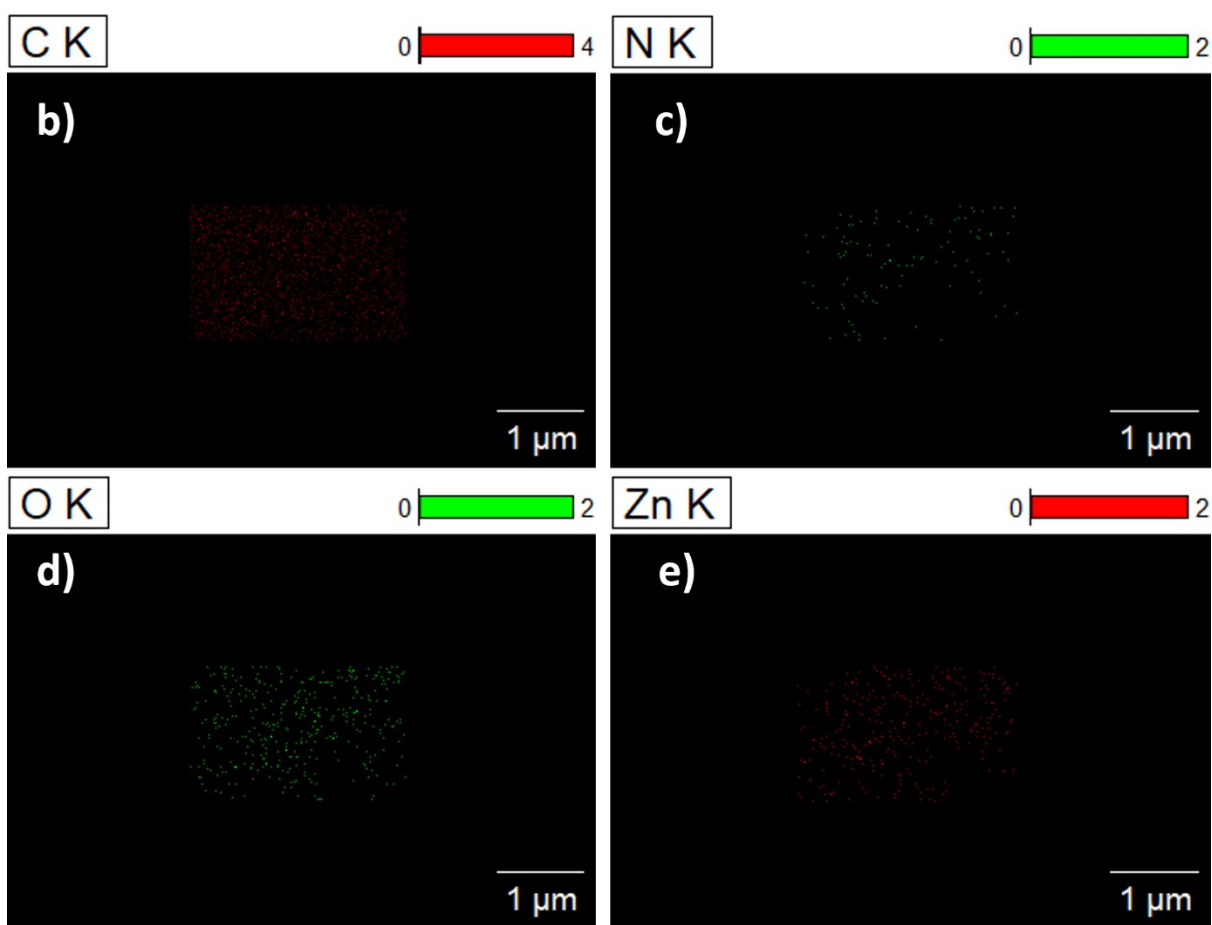

**Figure S3.** SEM image and elemental mapping of RhB<sub>10</sub>@ZIF-7.

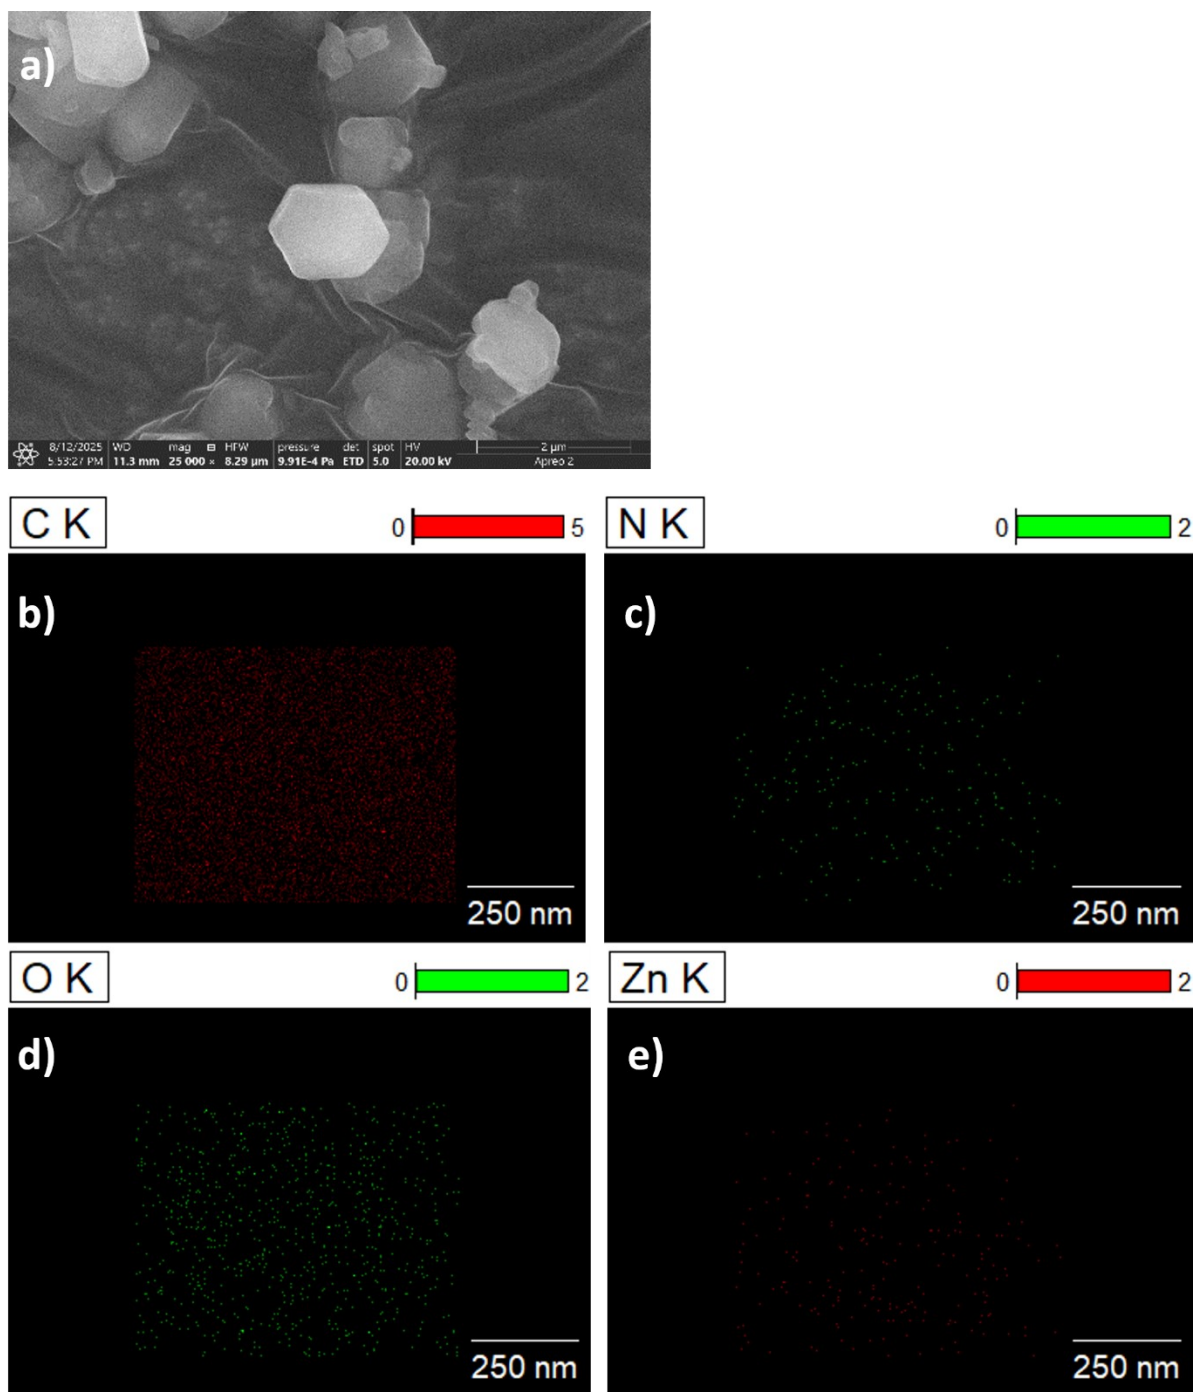

**Figure S4.** SEM image and elemental mapping of RhB<sub>30</sub>@ ZIF-7.

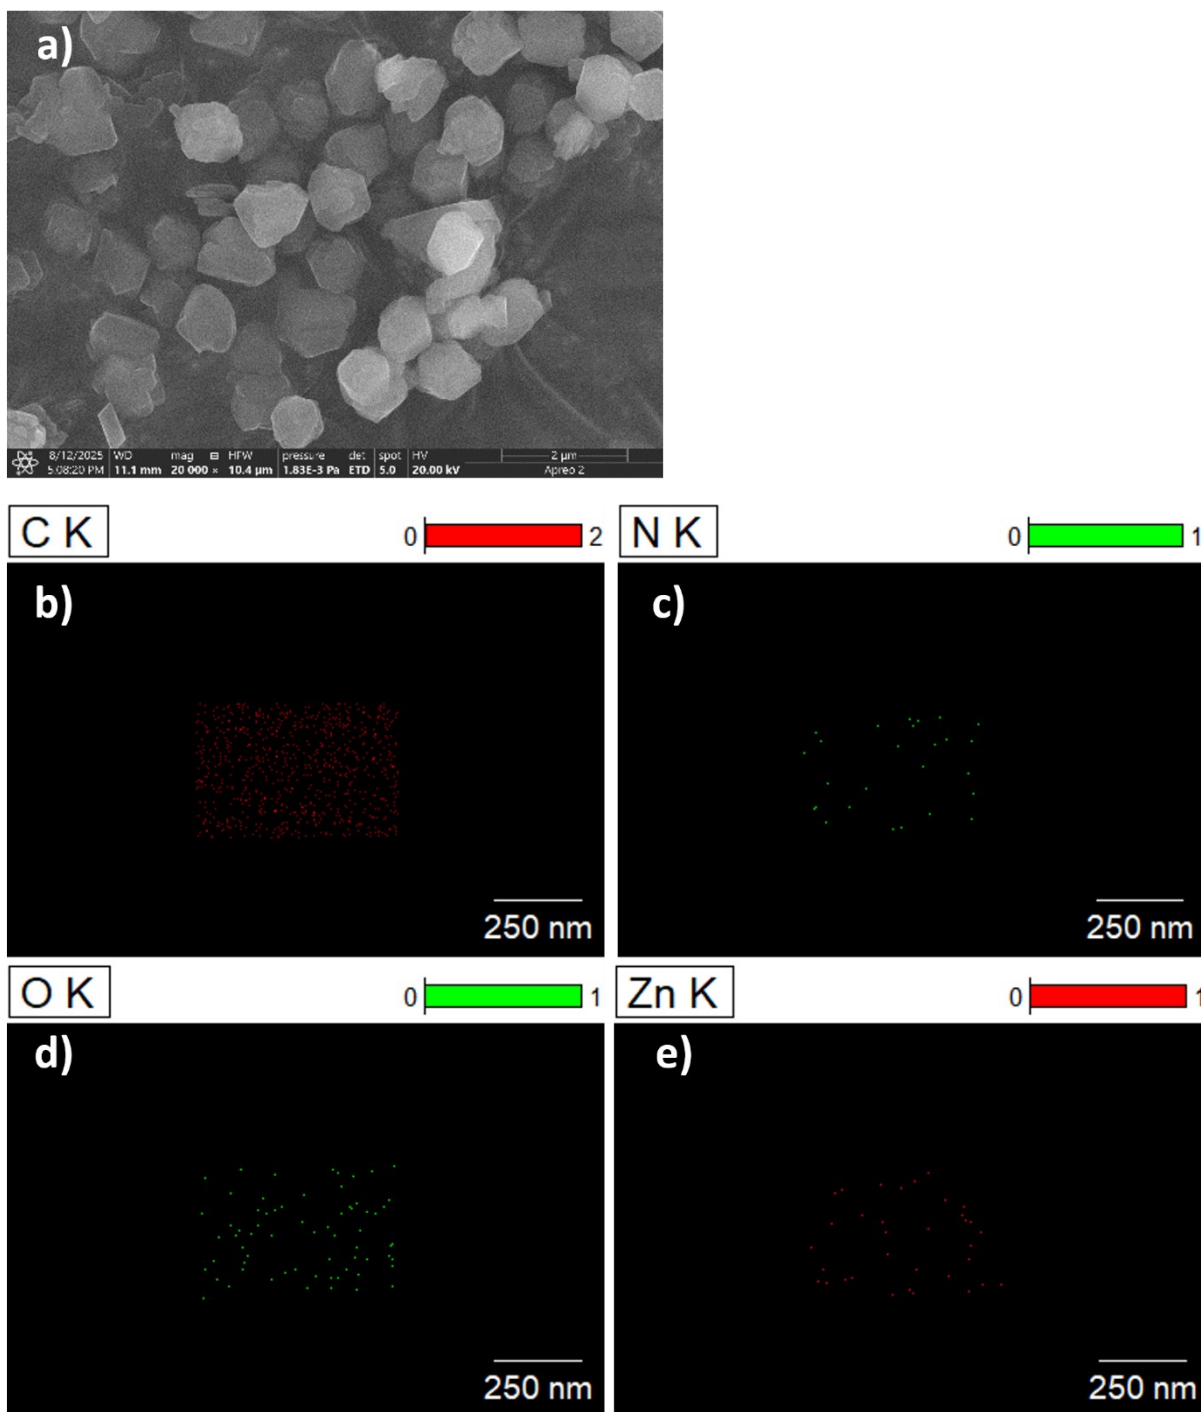

**Figure S5.** SEM image and elemental mapping of RhB<sub>50</sub>@ ZIF-7.

a)

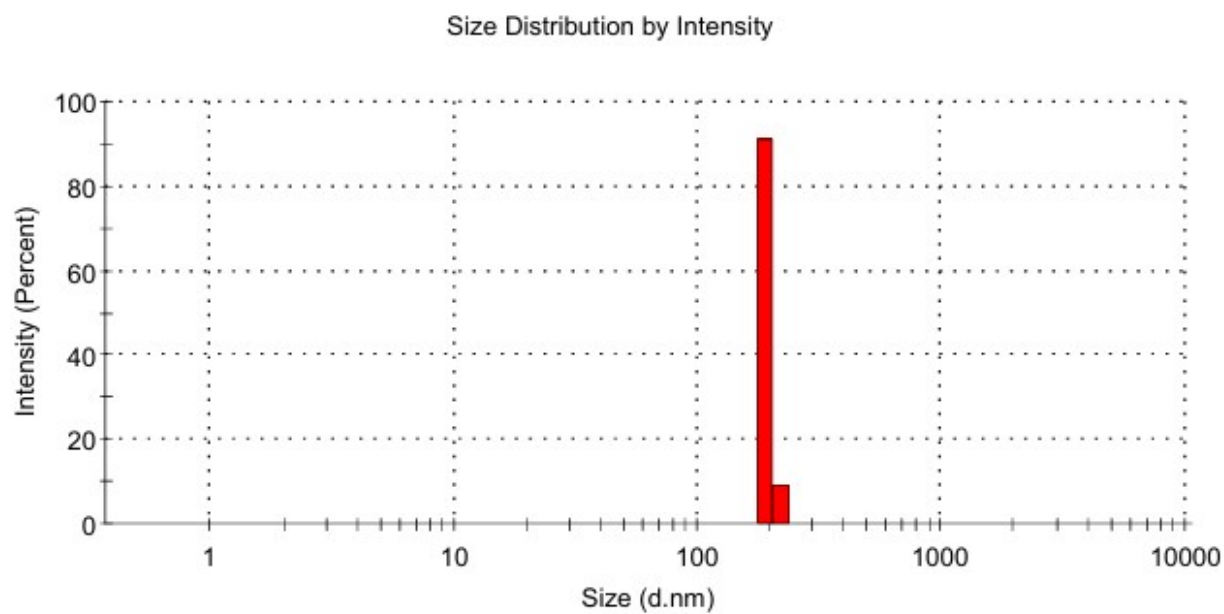

b)

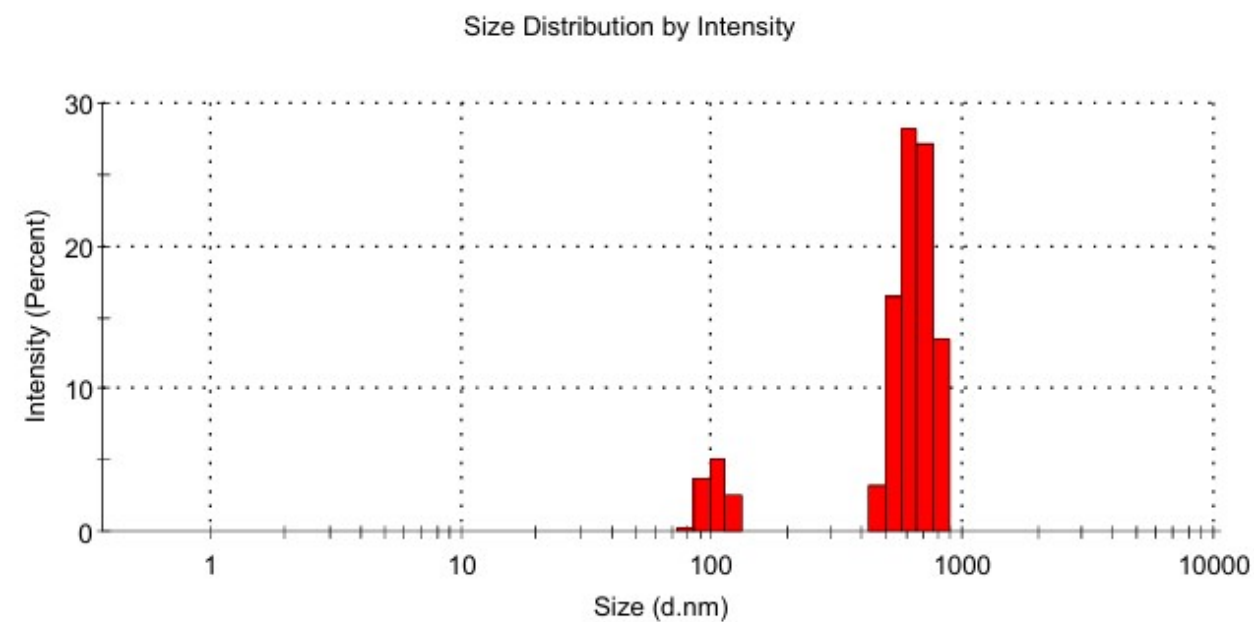

c)

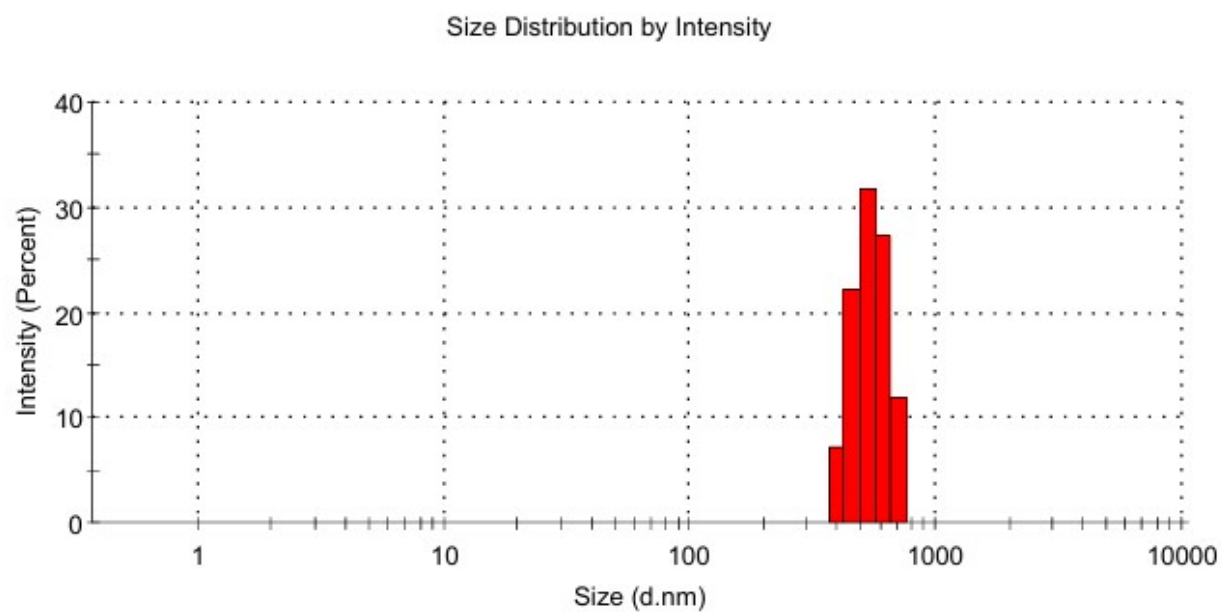

d)

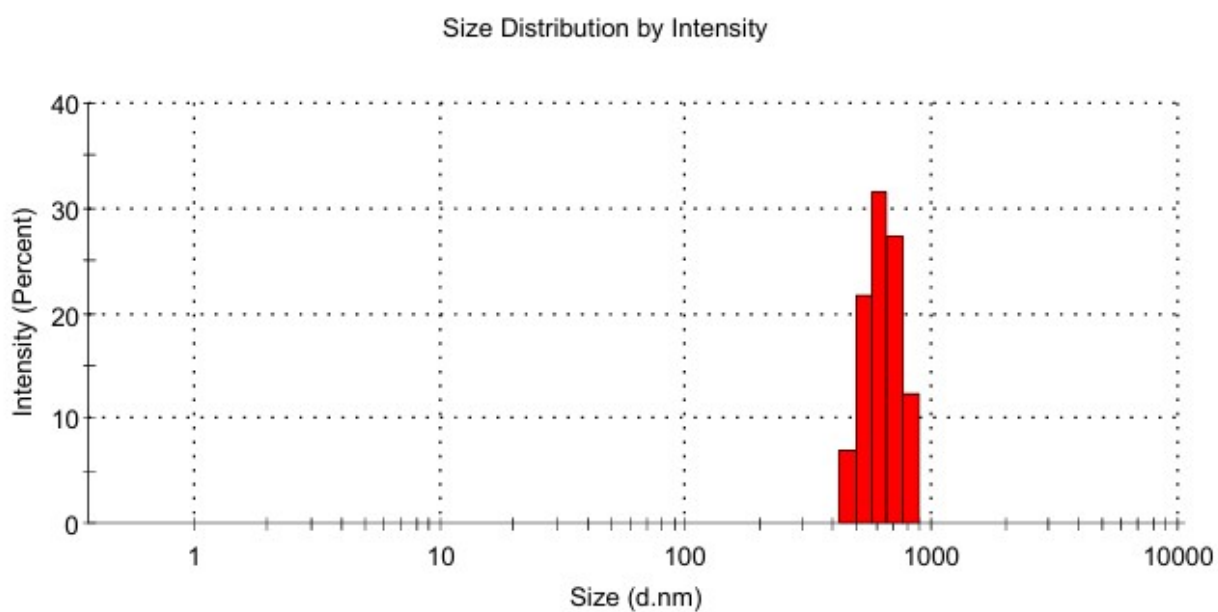

**Figure S6.** DLS Particle size analysis of a) pristine ZIF-7 , b) RhB<sub>10</sub>@ZIF-7, c) RhB<sub>30</sub>@ZIF-7, d) RhB<sub>50</sub>@ZIF-7



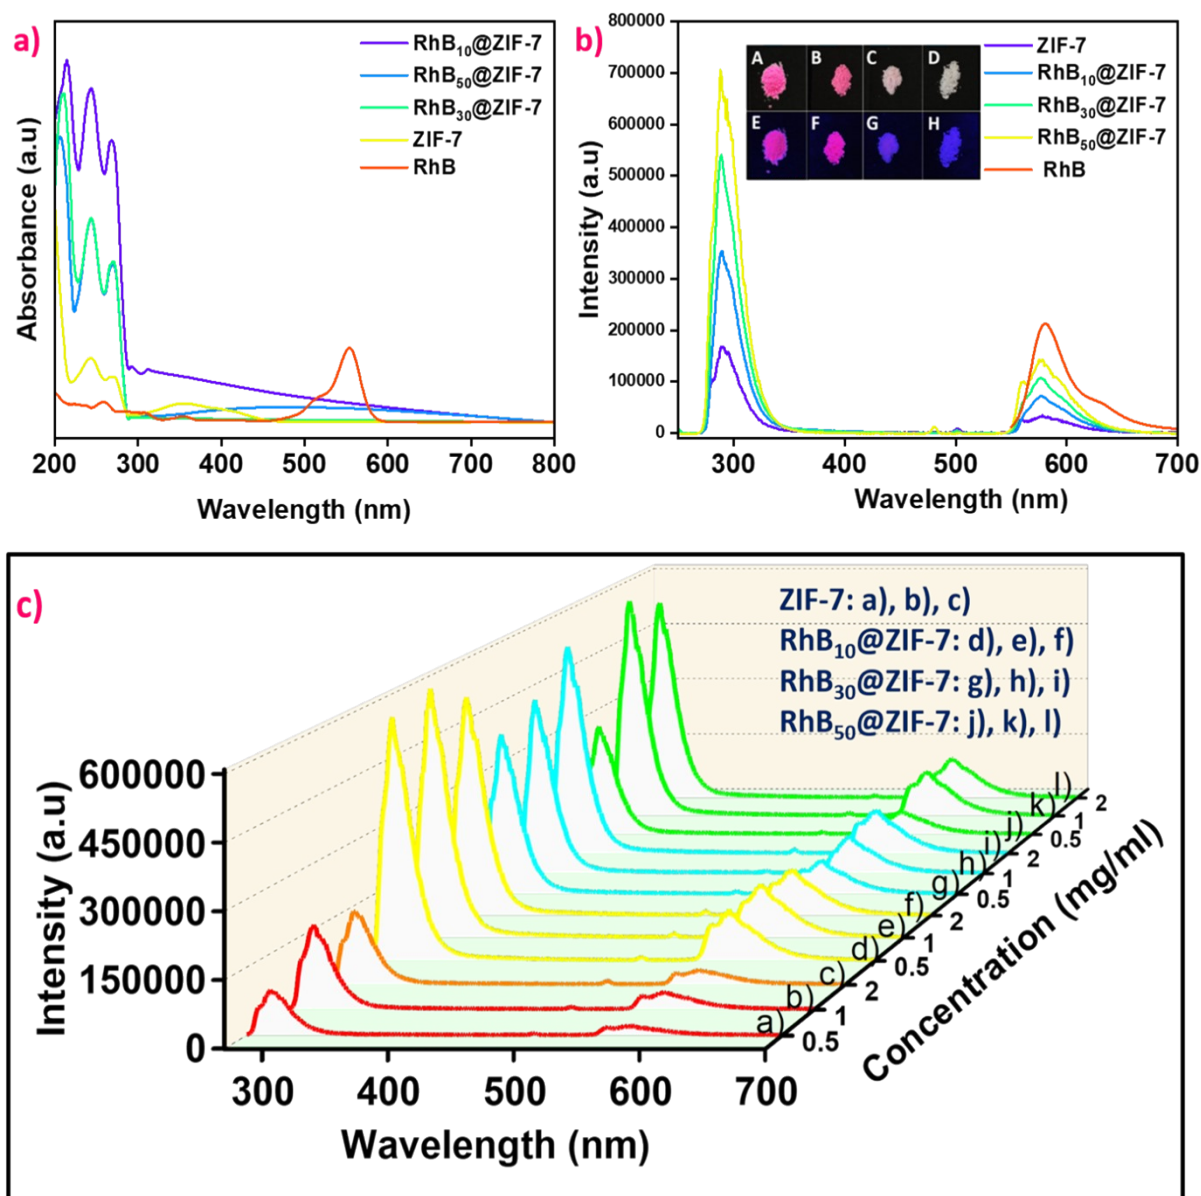

**Figure S7.** a) Absorption and b) Emission spectra of RhB, ZIF-7, and RhB<sub>x</sub>@ZIF-7 ( $x = 10, 30, 50$ ). Inset; Image under visible light A) RhB<sub>50</sub>@ZIF-7, B) RhB<sub>30</sub>@ZIF-7, C) RhB<sub>10</sub>@ZIF-7 and D) ZIF-7 & Image under UV light (365 nm) E) RhB<sub>50</sub>@ZIF-7, F) RhB<sub>30</sub>@ZIF-7, G) RhB<sub>10</sub>@ZIF-7 and H) ZIF-7. c) Emission spectra showing fluorescence response of ZIF-7, RhB<sub>10</sub>@ZIF-7, RhB<sub>30</sub>@ZIF-7, and RhB<sub>50</sub>@ZIF-7 to varying concentrations – 0.5, 1, and 2 mg/ml.

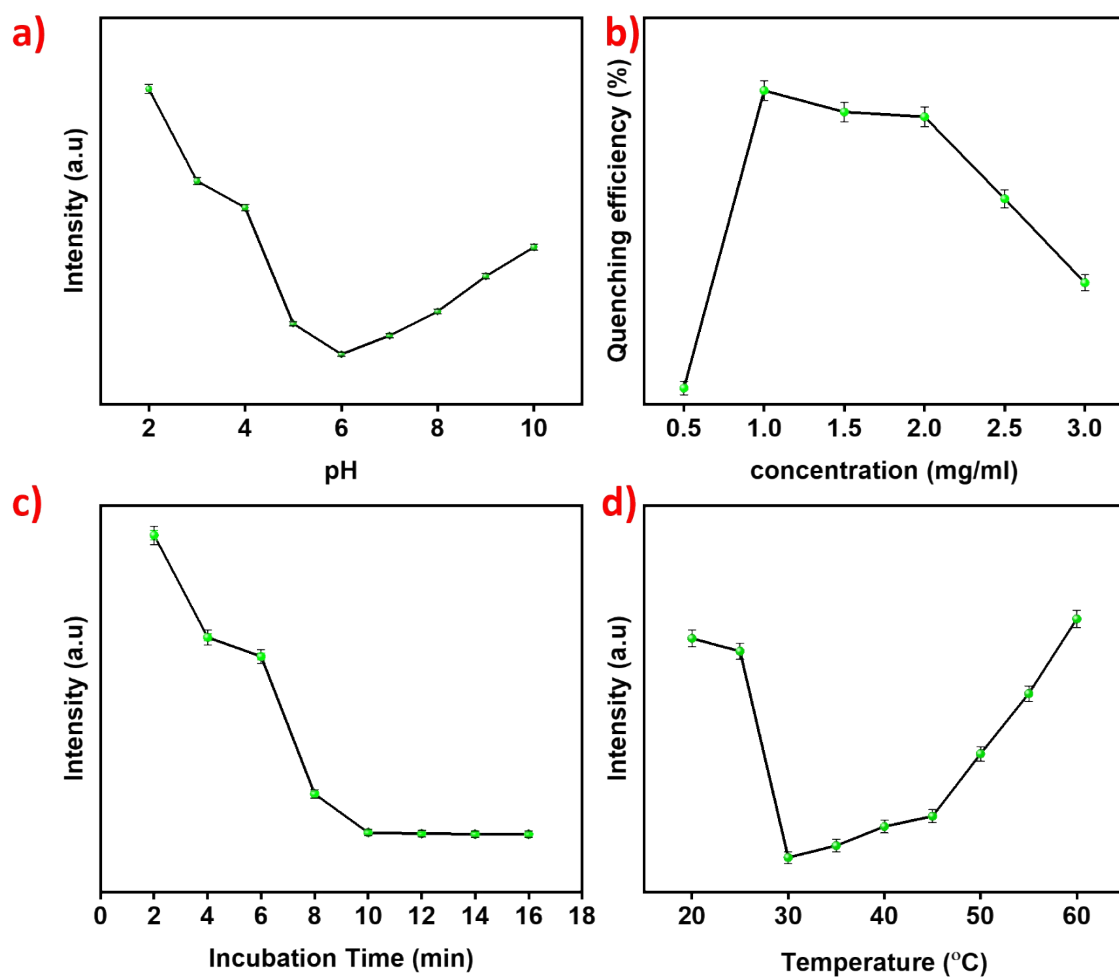

**Figure S8.** Effect of a) pH, b) probe concentration, c) incubation time, and d) temperature on the dual emission fluorescence detection of melamine.

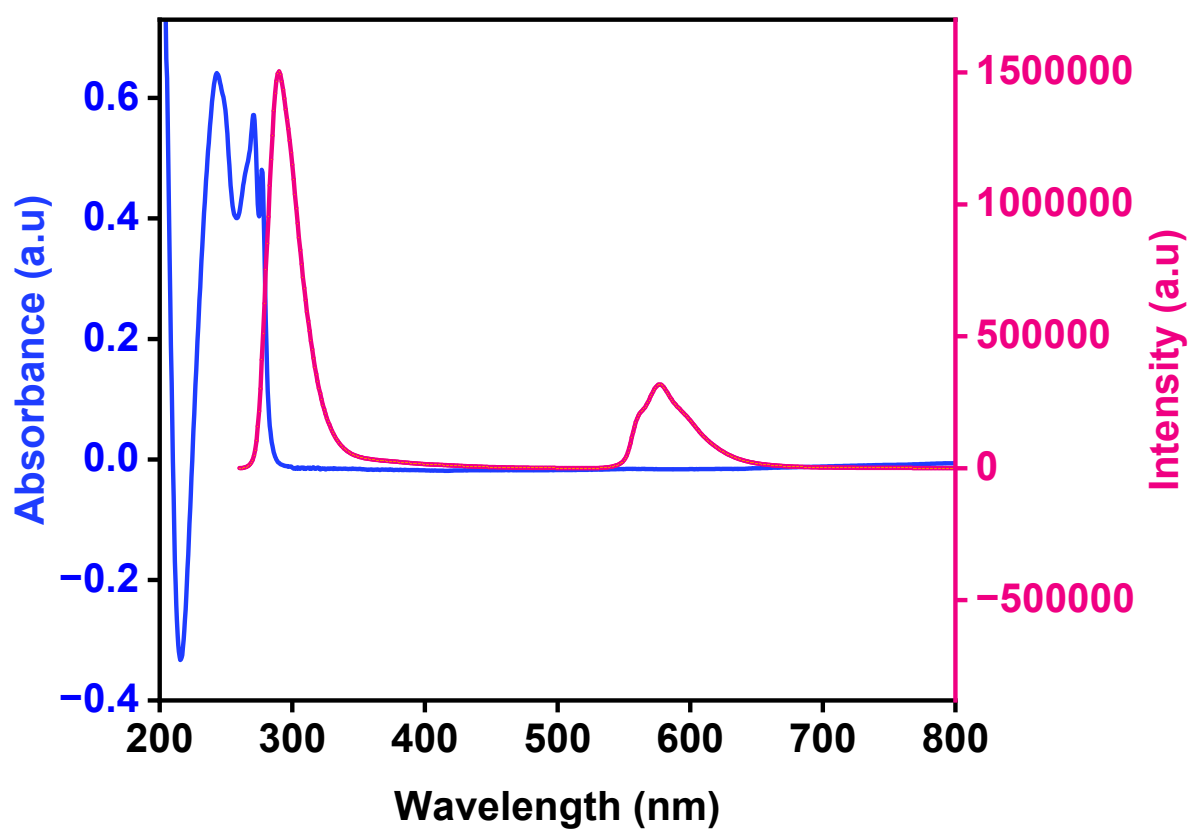

**Figure S9.** Absorption and emission spectra of RhB<sub>30</sub>@ZIF-7.

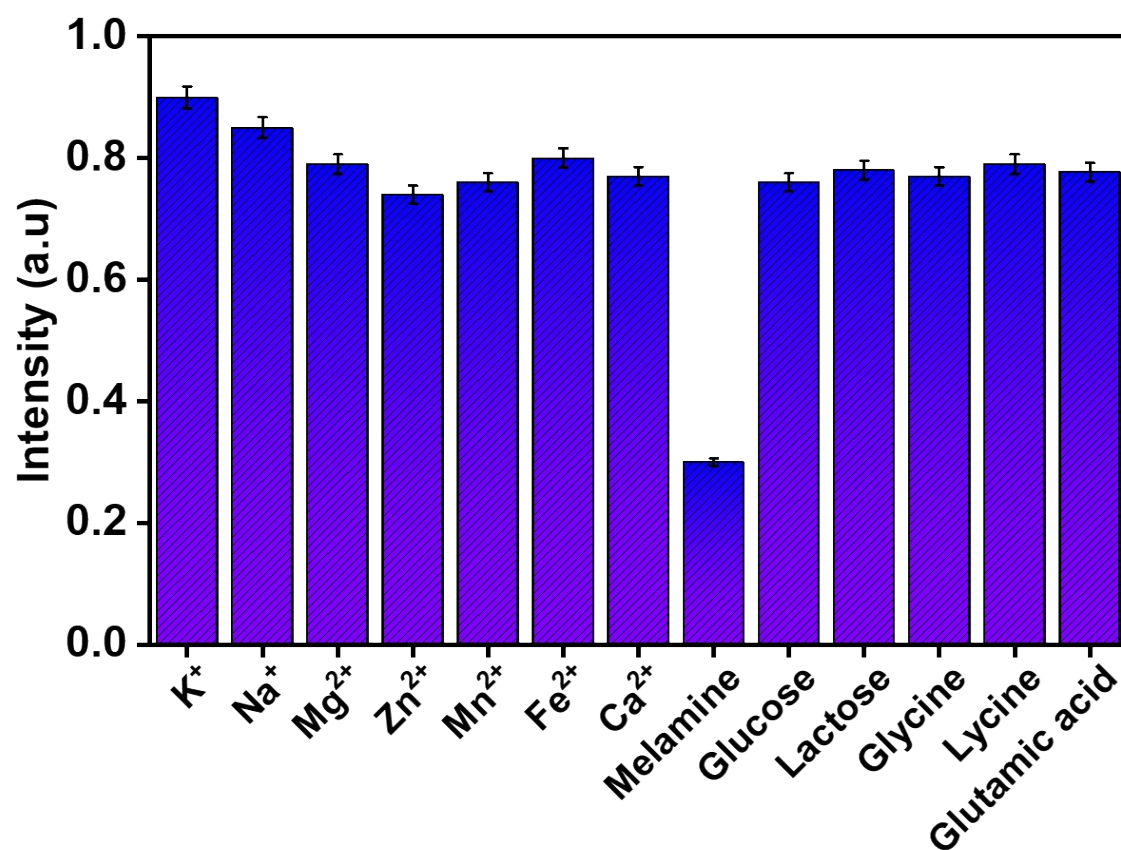

**Figure S10.** Fluorescent intensity response of RhB<sub>30</sub>@ZIF-7 system towards various ions and molecules (K<sup>+</sup>, Na<sup>+</sup>, Mg<sup>2+</sup>, Zn<sup>2+</sup>, Mn<sup>2+</sup>, Fe<sup>2+</sup>, Ca<sup>2+</sup>, Glucose, Lactose).
